# Supplementary material for: Novel π-complexes of divalent silicon: mixed substituted neutral sandwich compounds and the half-sandwich cation (iPr5C5)Si+
Source: Royal Society of Chemistry journal article supplement (doi:10.1039/b607236d), 2006-01-01
Supplement: b607236d.pdf [file b607236d.pdf]

Application of HMQC and HMBC techniques allowed the assignment of all  $^1\text{H}$ ,  $^{13}\text{C}$ , and  $^{29}\text{Si}$  NMR resonances of the compounds **4**, **5**, and **6**. The complete assignment is shown in Table 2.

Table 2: Assignment of NMR data of the compounds **4**, **5**, and **6**.

|                                                                                                     | $\delta_{\text{H}}$ [ppm]                            | $\delta_{\text{C}}$ [ppm]                                                                          | $\delta_{\text{Si}}$ [ppm] |
|-----------------------------------------------------------------------------------------------------|------------------------------------------------------|----------------------------------------------------------------------------------------------------|----------------------------|
| 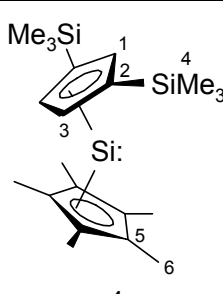 <p><b>4</b></p>   | H(1): 6.56<br>H(3): 5.87<br>H(4): 0.31<br>H(6): 1.71 | C(1): 132.7<br>C(2): 131.8<br>C(3): 111.1<br>C(4): 0.9<br>C(5): 119.4<br>C(6): 10.1                | -337.3                     |
|  <p><b>5</b></p>  | H(2): 5.44<br>H(4): 2.08<br>H(5): 1.99<br>H(7): 1.84 | C(1): 119.1<br>C(2): 111.2<br>C(3): 124.4<br>C(4): 14.4<br>C(5): 12.6<br>C(6): 119.4<br>C(7): 10.4 | -333.0                     |
|  <p><b>6</b></p> | H(2): 5.38<br>H(4): 2.02<br>H(5): 1.93               | C(1): 120.6<br>C(2): 112.0<br>C(3): 124.6<br>C(4): 14.2<br>C(5): 12.4                              | -311.4                     |
